# Supplementary figures and images for: A Tree‐Based Model for Setting Optimal Train Fare Zones
Source: Hindawi journal article supplement (doi:10.1155/2014/384321), 2014-01-01

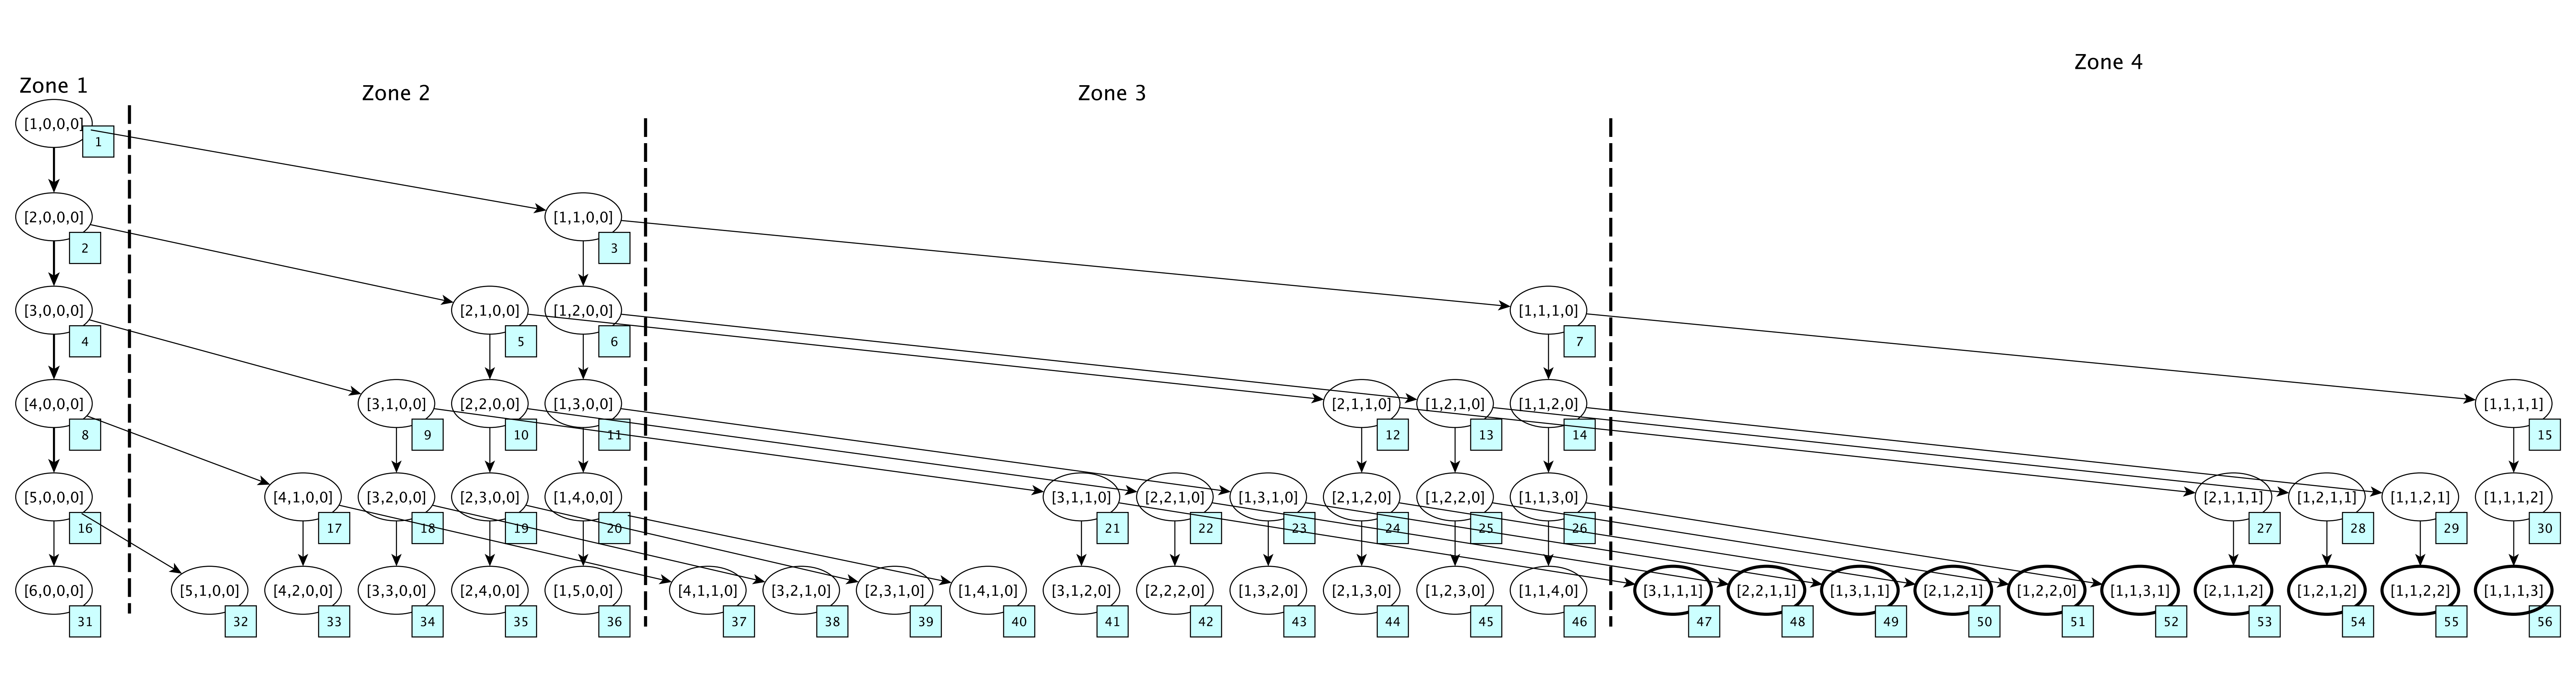

Supplement: f1 [file 384321.f1.pdf]
